# Supplementary material for: Comparative effects of zearalenone and nanozeolite on physiological and biochemical traits of Arugula (Eruca sativa) under regulated deficit irrigation
Source: Research Square preprint supplement (doi:10.21203/rs.3.rs-6170739/v1), 2025-04-01
Supplement: Supplementary file 1 [file 23ed289c5c38dd6a42d253a9.xlsx]

## Sheet: Sheet1
rep	treatment	irrigation	co2	respiration	wue	An	gs	RWC	fv/fm	Fv	fm	f0	osmotic potential	water potential	turgor potential	electrolyte leakage	leaf area	root fresh weight	aerial fresh weight	Proline	SOD	chl index
1	1	1	245	1.23	5.28455	6.5	0.6739	59.95	0.570814	585.46	1024.9	429.91	-4.58	-2.16	2.18	41.43	32.06	1.4	372.91	0.29	13.9	29.6
2	1	1	245	1.45	4.75862	6.9	0.7661	64.71	0.593268	609.06	1039.02	439.49	-4.22	-2.04	2.42	43.23	37.94	1.6	381.75	0.26	14.1	26
3	1	1	224	1.47	4.96599	7.3	0.72	62.33	0.571913	597.26	1031.96	434.7	-4.4	-2.1	2.3	42.33	35	1.5	377.33	0.29	14	27.6
1	2	1	280	0.93	7.52688	7	0.5852	74.94	0.706614	862.52	1253.16	371.02	-3.42	-2.28	1.13	29.86	44.9	1.05	398.12	0.39	25	22.2
2	2	1	295	1.25	5.92	7.4	0.6148	81.06	0.714172	912.7	1284.78	391.7	-3.18	-1.38	1.81	31.8	50.44	1.15	399.22	0.43	29	34.9
3	2	1	280	0.93	8.3871	7.8	0.6	78	0.676861	887.61	1268.97	381.36	-3.3	-1.83	1.47	30.83	47.67	1.1	398.67	0.39	15	29.1
1	3	1	265	0.7	12.7143	8.9	0.6964	74.3	0.845173	1071.44	1289.15	208.59	-2.06	-1.32	0.73	19.53	68.26	1.14	385.1	0.5	25	36.1
2	3	1	255	0.65	12.6154	8.2	0.7236	77.7	0.828465	1092	1299.09	216.19	-1.94	-0.62	1.33	23.13	78.4	1.2	397.56	0.23	31	31.9
3	3	1	260	0.8	9	7.2	0.71	76	0.8339	1081.72	1294.12	212.39	-2	-0.97	1.03	21.33	73.33	1.17	391.33	0.5	18	34
1	4	1	250	0.35	70.1714	24.56	0.8124	77.22	0.82841	1067.81	1288	216.14	-3.02	-1.76	1.14	16.31	63.91	1.4	349.82	0.41	30	33.8
2	4	1	260	0.34	65.5882	22.3	0.8476	92.78	0.829284	1107.65	1324.79	221.2	-2.78	-1.64	1.26	19.15	74.09	1.6	369.52	0.45	33	35.2
3	4	1	258	0.4	58.5	23.4	0.83	85	0.839882	1087.73	1306.39	218.67	-2.9	-1.7	1.2	17.73	69	1.5	359.67	0.48	27	33.8
1	5	1	354	0.35	70.2286	24.58	0.7882	86.54	0.839081	1151.78	1389.1	225.98	-2.71	-0.68	2.02	18.76	70.82	1.75	433.82	0.49	29	32.8
2	5	1	360	0.38	62.1053	23.6	0.8118	100.12	0.838359	1171.5	1398.06	237.9	-2.69	-0.32	2.38	21.18	73.18	1.99	472.18	0.39	33	33.1
3	5	1	335	0.48	45.8333	22	0.8	93.33	0.823197	1161.64	1393.58	231.94	-2.7	-0.5	2.2	19.97	72	1.87	453	0.39	31	30.8
1	1	2	107	1.12	3.48214	3.9	0.3662	47.85	0.500791	495.76	987.55	479.89	-9.67	-9.08	0.5	46.94	34.97	1.53	247.59	0.44	27	22.8
2	1	2	98	1.11	3.69369	4.1	0.4098	50.81	0.530754	520.94	1002.69	493.63	-8.73	-8.12	0.7	49.32	38.37	1.93	255.07	0.38	29	22.8
3	1	2	107	1.13	3.71681	4.2	0.38	49.33	0.500768	508.35	995.12	486.76	-9.2	-8.6	0.6	48.13	36.67	1.73	251.33	0.45	27	24.4
1	2	2	120	0.9	11.7333	10.56	0.4206	67.17	0.64355	730	1153.9	419.56	-7.4	-4.34	3.22	31.37	36.43	2.21	286.98	0.44	40	29.2
2	2	2	130	0.8	14.0625	11.25	0.4994	68.83	0.628766	749.8	1178.3	432.84	-6.6	-2.78	3.64	34.23	38.23	2.45	289.02	0.53	45	34.7
3	2	2	135	1	12.4	12.4	0.46	68	0.631173	739.9	1166.1	426.2	-7	-3.56	3.43	32.8	37.33	2.33	288	0.44	37	29.2
1	3	2	140	0.34	50.5882	17.2	0.4382	74.97	0.649715	730.99	1132.74	402.5	-6.3	-3.23	2.47	36.37	44.95	2.16	310.33	0.69	45	36.9
2	3	2	140	0.3	54.6	16.38	0.4818	78.37	0.667441	795.55	1203.42	407.12	-5.9	-2.83	3.67	37.17	50.39	2.3	317.01	0.49	49	35.3
3	3	2	130	0.39	47.8205	18.65	0.46	76.67	0.641826	763.27	1168.08	404.81	-6.1	-3.03	3.07	36.77	47.67	2.23	313.67	0.48	49	34
1	4	2	133	0.22	63.6364	14	0.5772	79.88	0.636639	775.52	1205.71	409.5	-7.3	-4.57	2.4	30.43	65.11	2.15	344.93	0.66	43	32
2	4	2	139.1	0.21	70.9048	14.89	0.6028	80.12	0.649905	819.18	1229.71	431.22	-6.5	-3.57	3.26	35.43	67.55	2.25	352.41	0.66	51	30.3
3	4	2	150	0.25	60	15	0.59	80	0.67727	797.35	1217.71	420.36	-6.9	-4.07	2.83	32.93	66.33	2.2	348.67	0.6	43	30
1	5	2	230	0.18	95.7222	17.23	0.5731	76.63	0.780554	1039.29	1334.06	290.5	-7.14	-3.4	3.45	20.95	61.41	2.39	414.33	0.72	50	35
2	5	2	242	0.22	70	15.4	0.6269	80.03	0.768214	1069.15	1371.64	306.76	-6.66	-2.8	4.15	22.91	62.59	2.47	431.67	0.71	45	32.9
3	5	2	220	0.22	65.2273	14.35	0.6	78.33	0.789134	1054.22	1352.85	298.63	-6.9	-3.1	3.8	21.93	62	2.43	423	0.88	51	34
